# Supplementary material
Source: publisher site journal article supplement (https://www.spandidos-publications.com/3238/downloadSupplementary)

Figure S1. Transfection efficiency of siRNAs of MALAT1, XIST and Tsix. (A) MALAT1 knockdown decreased its expression levels compared with those in mock cells. (B) XIST knockdown decreased its expression levels significantly compared with those in mock cells. (C) Tsix knockdown decreased its expression levels in MDA-MB-231 cells compared with those in untransfected mock cells. (D) Using reverse transcription-quantitative PCR, the transfection efficiency was determined in both mimic-transfected and mock cells at 48 h after transfection, mimic transfection in MDA-MB-231 resulted in increased miR-182-5p expression compared with that in mock cells. Analysis was performed using one-way ANOVA for multiple groups and Dunnett's multiple comparison test. Experiments were performed in quadruplicate. \*\*P<0.01. MALAT1, metastasis-associated lung adenocarcinoma transcript 1; miR, microRNA; RQ, relative quantitation; si, small interfering RNA; XIST, X-inactive specific transcript; Tsix, TSIX transcript, XIST antisense RNA.

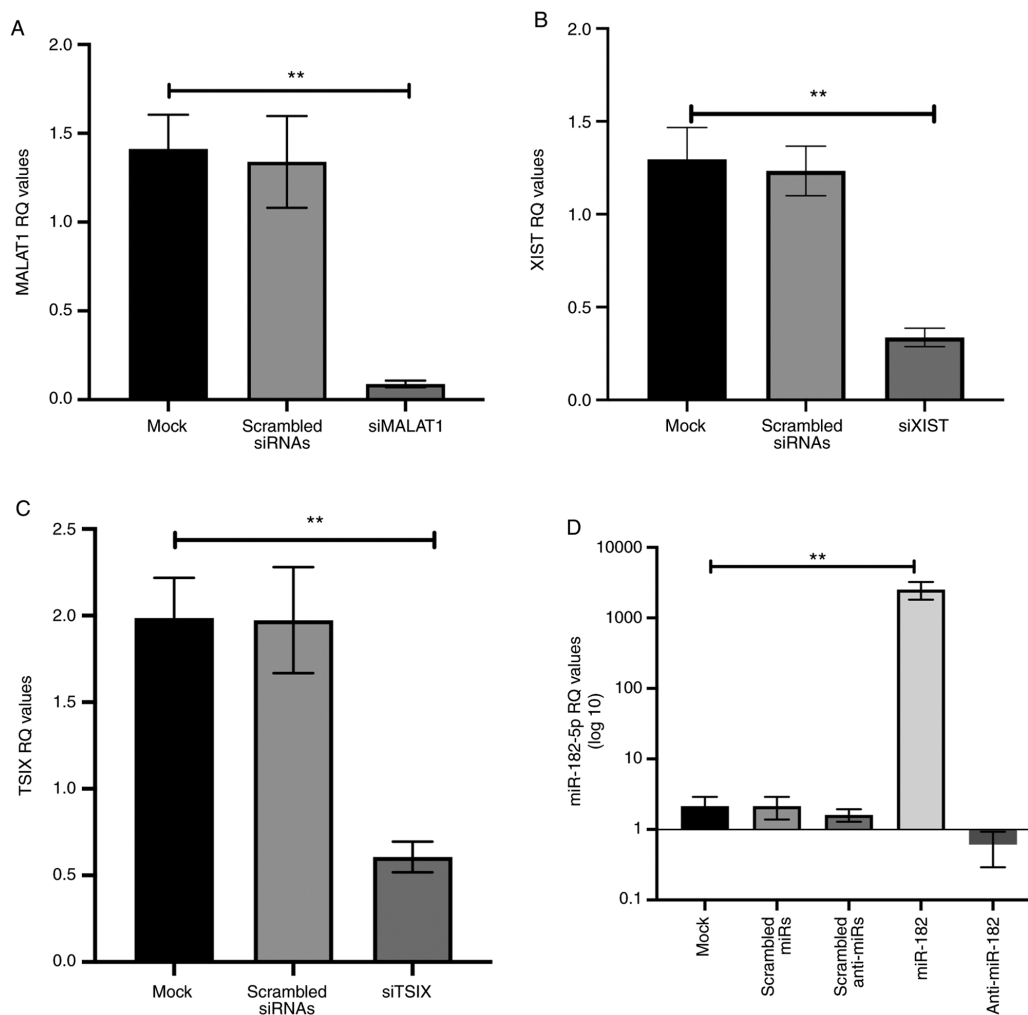

Supplement: Supplementary file 1 [file downloadSupplementary]
